# Supplementary material for: Vaccination with the immunoglobulin M-degrading enzyme of Streptococcus suis, IdeSsuis, leads to protection against a highly virulent serotype 9 strain
Source: PubMed Central journal article supplement — Vaccine X. 2019 Oct 10;3:100046. doi: 10.1016/j.jvacx.2019.100046 (PMC6831886; doi:10.1016/j.jvacx.2019.100046), 2019-10-10
Supplement: mmc1.pdf [file mmc1.pdf]

## Appendix

Fig. S1: Results of the bactericidal assay after the 2<sup>nd</sup> rIde<sub>Ssuis</sub>-booster-vaccination

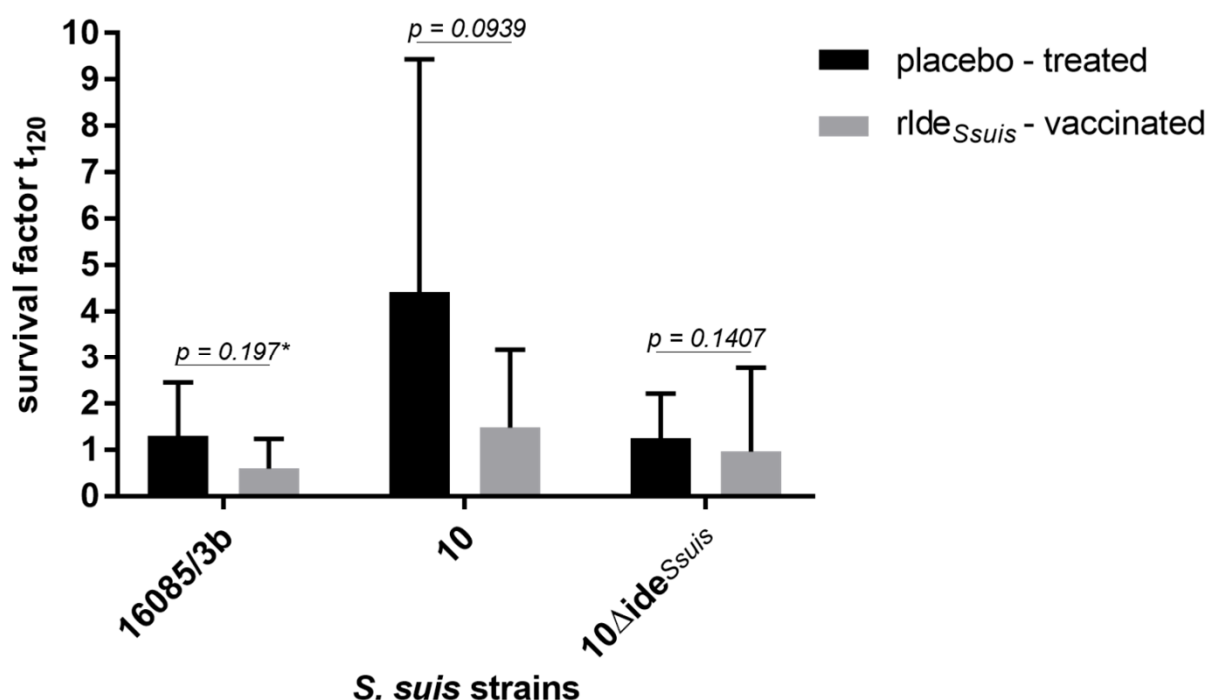

Fig. S1: Survival of *S. suis* strain 10 and 16085/3b in placebo-treated piglets is substantially higher than in rIde<sub>Ssuis</sub>-vaccinated littermates. A bactericidal assay for *cps9* strain 16085/3b, *cps2* strain 10 and its isogenic mutant 10 $\Delta$ ide<sub>Ssuis</sub> was conducted with blood drawn 17 days after the 2<sup>nd</sup> rIde<sub>Ssuis</sub>-booster-vaccination and a few minutes prior to challenge with the *cps9* strain. Bars and error bars represent mean values and standard deviations, respectively. The Mann-Whitney-U-test was used for comparison of rIde<sub>Ssuis</sub>-vaccinated versus placebo-treated group. *P* values are indicated. \*Note that values of 16085/3b are normally distributed. Analysis with an unpaired t test resulted in a *p* value of 0.1167.
