# Supplementary material for: Vaccination with the immunoglobulin M-degrading enzyme of Streptococcus suis, IdeSsuis, leads to protection against a highly virulent serotype 9 strain
Source: PubMed Central journal article supplement — Vaccine X. 2019 Oct 10;3:100046. doi: 10.1016/j.jvacx.2019.100046 (PMC6831886; doi:10.1016/j.jvacx.2019.100046), 2019-10-10
Supplement: mmc2.pdf [file mmc2.pdf]

## Appendix

Fig. S2: Body temperature curves of  $rlde_{Ssuis}$ -vaccinated piglets after experimental infection with *S. suis cps9* strain 16085/3b

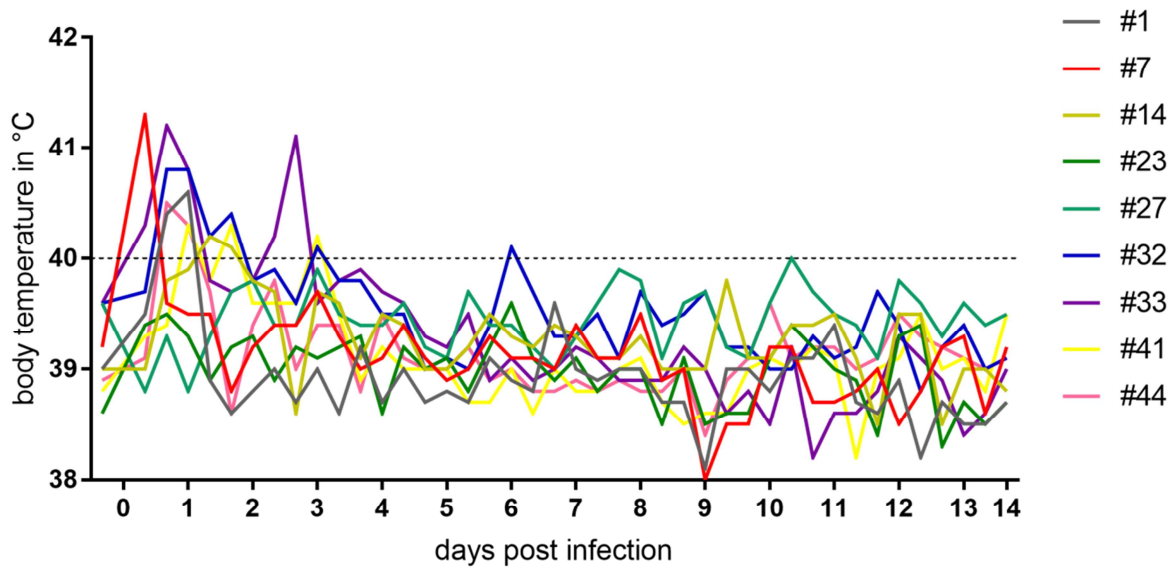

Fig. S2: Experimental infection with *S. suis cps9* strain 16085/3b leads to short-time fever in vaccinated piglets. Body temperatures were measured three times daily, i.e. every 8 hours following challenge. Temperatures  $>40.0^{\circ}\text{C}$  were classified as fever.
