# Supplementary material for: Vaccination with the immunoglobulin M-degrading enzyme of Streptococcus suis, IdeSsuis, leads to protection against a highly virulent serotype 9 strain
Source: PubMed Central journal article supplement — Vaccine X. 2019 Oct 10;3:100046. doi: 10.1016/j.jvacx.2019.100046 (PMC6831886; doi:10.1016/j.jvacx.2019.100046), 2019-10-10
Supplement: mmc3.pdf [file mmc3.pdf]

## Appendix

Fig. S3: Vaccination-induced adaptive  $Ide_{Ssuis}$  response is not enhanced by *S. suis* challenge.

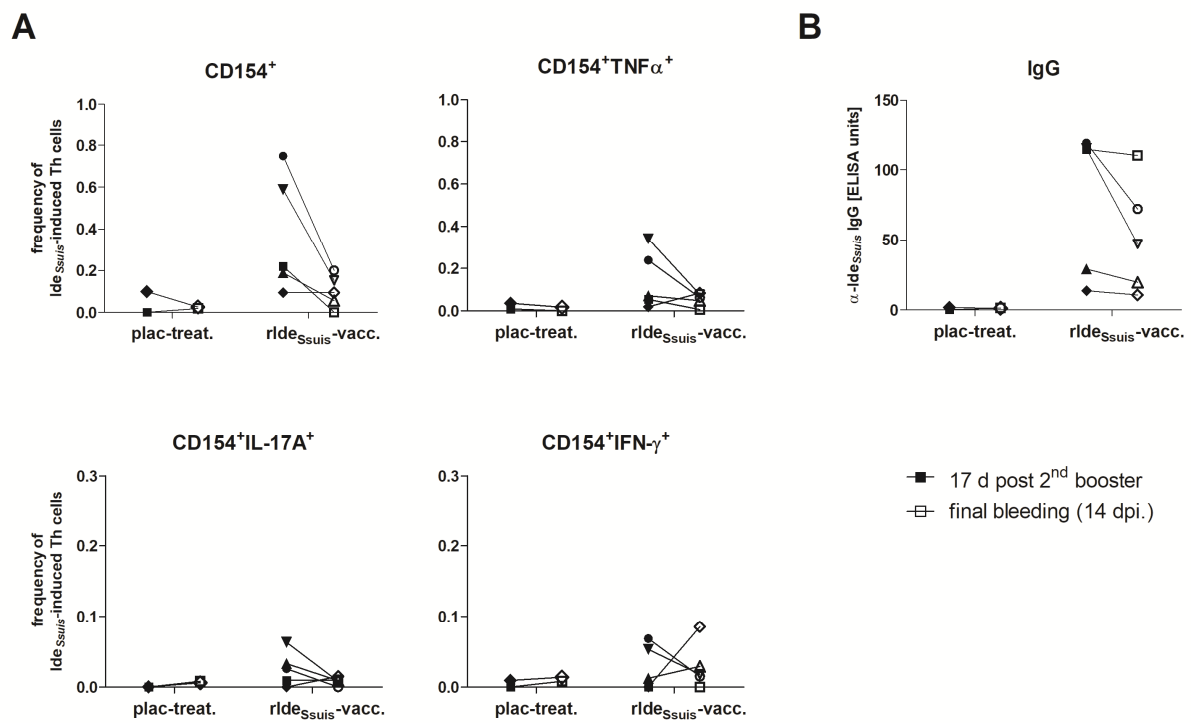

Fig. S3: Vaccination-induced adaptive  $Ide_{Ssuis}$  response is not enhanced by *S. suis* challenge. A) Frequency of  $Ide_{Ssuis}$ -induced Th cells following antigen-specific restimulation *in vitro* from PBMC samples and B)  $Ide_{Ssuis}$ -specific IgG from serum samples before (17 d post 2<sup>nd</sup> booster, ■ black symbols) and after challenge (14 dpi., □, white symbols) with *S. suis* strain 16085/3b. Individual piglets are indicated by different symbols. To detect intracellular CD154 and cytokines PBMCs were stimulated with  $rIde_{Ssuis}$  (5  $\mu$ g/ml) in comparison to medium alone in presence of Brefeldin A (2  $\mu$ g/ml). Frequency of  $Ide_{Ssuis}$ -induced Th cells represents the difference of frequency of CD154<sup>+</sup> cells induced by  $rIde_{Ssuis}$  minus the frequency in medium control. Statistical analysis was conducted with Wilcoxon signed rank test. No significant differences were calculated.
