# Supplementary material for: Vaccination with the immunoglobulin M-degrading enzyme of Streptococcus suis, IdeSsuis, leads to protection against a highly virulent serotype 9 strain
Source: PubMed Central journal article supplement — Vaccine X. 2019 Oct 10;3:100046. doi: 10.1016/j.jvacx.2019.100046 (PMC6831886; doi:10.1016/j.jvacx.2019.100046), 2019-10-10
Supplement: mmc4.pdf [file mmc4.pdf]

## Appendix

Table S1: Scoring of clinical signs in piglets

| parameter         | score  |                 |                            |            |                 |          |                                              |
|-------------------|--------|-----------------|----------------------------|------------|-----------------|----------|----------------------------------------------|
|                   | 0      | 1               | 2                          | 3          | 8               | 10       | 25                                           |
| body temperature  | < 40°C | 40.0 - 40.2°C   | 40.3 - 40.5°C              | > 40.5°C   |                 |          |                                              |
| feed intake       | good   | moderate        |                            | ceased     |                 |          |                                              |
| lameness          | no     | low-grade       |                            | high-grade |                 |          | recumbency, polyarthritis                    |
| behaviour         |        | fresh           | faint                      |            |                 | listless | central nervous system disorder <sup>a</sup> |
| respiratory signs |        | costo-abdominal | forced abdominal breathing |            | cyanosis (ears) |          |                                              |

<sup>a</sup>tetanic spasm, opisthotonus, convulsions
