# Supplementary material for: Vaccination with the immunoglobulin M-degrading enzyme of Streptococcus suis, IdeSsuis, leads to protection against a highly virulent serotype 9 strain
Source: PubMed Central journal article supplement — Vaccine X. 2019 Oct 10;3:100046. doi: 10.1016/j.jvacx.2019.100046 (PMC6831886; doi:10.1016/j.jvacx.2019.100046), 2019-10-10
Supplement: mmc5.pdf [file mmc5.pdf]

Table S2: Individual clinical scores after *cps9* challenge and individual immunological data at different time points of the experiment.

| Immunization antigen  | piglet number | $\alpha$ -rIde <sub>Ssuis</sub> IgG (ELISA units) |                                 |                                  |                                      | Ide <sub>Ssuis</sub> reactive CD154 <sup>+b</sup> |                                      | highest clinical score <sup>c</sup> reached after challenge (dpi <sup>a</sup> ) |
|-----------------------|---------------|---------------------------------------------------|---------------------------------|----------------------------------|--------------------------------------|---------------------------------------------------|--------------------------------------|---------------------------------------------------------------------------------|
|                       |               | pre immunization                                  | 7d post 1 <sup>st</sup> booster | 17d post 2 <sup>nd</sup> booster | 14 dpi <sup>a</sup> (final bleeding) | 7d post 1 <sup>st</sup> booster                   | 14 dpi <sup>a</sup> (final bleeding) |                                                                                 |
| rIde <sub>Ssuis</sub> | #1            | 1.58                                              | 7.85                            | 114.54                           | 110.22                               | 0.2208                                            | 0.0000                               | <b>5</b> (1)                                                                    |
|                       | #7            | 2.28                                              | 46.24                           | 115.00                           | 47.15                                | 0.5893                                            | 0.1530                               | <b>9</b> (0)                                                                    |
|                       | #14           | 1.49                                              | 18.61                           | 85.16                            | 26.51                                | 0.1690                                            | n.d. <sup>d</sup>                    | <b>3</b> (1)                                                                    |
|                       | #23           | 1.03                                              | 21.15                           | 42.95                            | 27.27                                | 0.2830                                            | n.d. <sup>d</sup>                    | <b>3<sup>e</sup></b> (9)                                                        |
|                       | #27           | 2.48                                              | 40.31                           | 119.10                           | 72.14                                | 0.7499                                            | 0.2000                               | <b>4</b> (1)                                                                    |
|                       | #32           | 3.40                                              | 9.40                            | 41.08                            | 17.62                                | 0.0927                                            | n.d. <sup>d</sup>                    | <b>5</b> (2)                                                                    |
|                       | #33           | 1.15                                              | 3.53                            | 29.17                            | 19.68                                | 0.1893                                            | 0.0560                               | <b>4</b> (1)                                                                    |
|                       | #41           | 2.12                                              | 7.61                            | 18.60                            | 18.52                                | 0.2341                                            | n.d. <sup>d</sup>                    | <b>6</b> (3)                                                                    |
| #44                   | 2.13          | 9.43                                              | 13.64                           | 10.68                            | 0.0950                               | 0.0950                                            | <b>15</b> (1)                        |                                                                                 |
| placebo               | #2            | 0.91                                              | 0.32                            | 0.15                             | 0.08                                 | 0.0683                                            | †                                    | <b>25</b> (0)                                                                   |
|                       | #10           | 0.94                                              | 0.37                            | 0.10                             | 0                                    | 0.1049                                            | †                                    | <b>25</b> (0)                                                                   |
|                       | #15           | 1.45                                              | 0.74                            | 0.27                             | 0.15                                 | 0.0957                                            | †                                    | <b>25</b> (0)                                                                   |
|                       | #20           | 1.67                                              | 0.65                            | 1.83                             | 1.29                                 | 0.0993                                            | 0.0260                               | <b>1</b> (0, 5, 8)                                                              |
|                       | #26           | 2.08                                              | 0.66                            | 0.28                             | 0.27                                 | 0.0697                                            | †                                    | <b>25</b> (1)                                                                   |
|                       | #28           | 4.25                                              | 0.79                            | 0.28                             | 0.25                                 | 0.0223                                            | †                                    | <b>25</b> (0)                                                                   |
|                       | #30           | 1.98                                              | 0.64                            | 0.31                             | 0.28                                 | 0.0000                                            | †                                    | <b>25</b> (1)                                                                   |
|                       | #38           | 1.52                                              | 0.29                            | 0.20                             | 0.41                                 | 0.0013                                            | †                                    | <b>17<sup>f</sup></b> (3)                                                       |
|                       | #39           | 2.08                                              | 0.45                            | 0.33                             | 1.38                                 | 0.0014                                            | 0.0190                               | <b>25</b> (14)                                                                  |

<sup>a</sup> days post infection

<sup>b</sup> frequency within CD4<sup>+</sup>CD8 $\alpha$ <sup>+</sup> cell population, pre-gated from viable CD3<sup>+</sup> lymphocytes (see Fig. 5A)

<sup>c</sup> For the detailed clinical scoring system see Table S1.

<sup>d</sup> not determined

<sup>e</sup> Clinical signs of this piglet were most likely not associated with the experimental infection.

† piglets were euthanized before 14 dpi.

<sup>f</sup> This piglet was euthanized due to persisting clinical signs including high fever ( $\geq 40.5$  °C), apathy and anorexia over 32 hours.
